# Supplementary material for: A Multifaceted Intervention and Its Effects on Antibiotic Usage in Norwegian Nursing Homes
Source: MDPI journal article supplement (doi:10.3390/antibiotics12091372), 2023-08-27
Supplement: s1 [file s1]

**Table S1.** Total mean antibiotic use in DDD/100 BD, and the model-based \* estimated changes identified \*\* pre- (Oct. 2015 – Oct. 2016) and post-intervention (Oct. 2016 – Oct. 2017) for the control counties.

| Counties           | DDD/100     | DDD/100      | $\beta$ | 95% CI          | P     |
|--------------------|-------------|--------------|---------|-----------------|-------|
|                    | BD Baseline | Intervention |         |                 |       |
| Buskerud (control) | 7.48        | 7.28         | -0.23   | -1.09 – 0.63    | 0.604 |
| Agder (control)    | 7.01        | 7.63         | 0.61    | -0.11 – 1.34    | 0.098 |
| Telemark (control) | 11.68       | 10.24        | -1.54   | -3.12 –<br>0.05 | 0.057 |
| Vestfold (control) | 9.21        | 7.34         | -1.84   | -3.39 – -0.29   | 0.02  |

\* Linear mixed model regression analysis.

\*\* All models adjusted for NH size, NH category and doctor hours/bed/week.

Figure S1. Changes in antibiotic use in DDD/100 BD per nursing home category and per county, pre- and post-intervention periods, for the intervention county and control counties, Oct. 2015 – Oct. 2016 versus Oct. 2016 – Oct. 2017

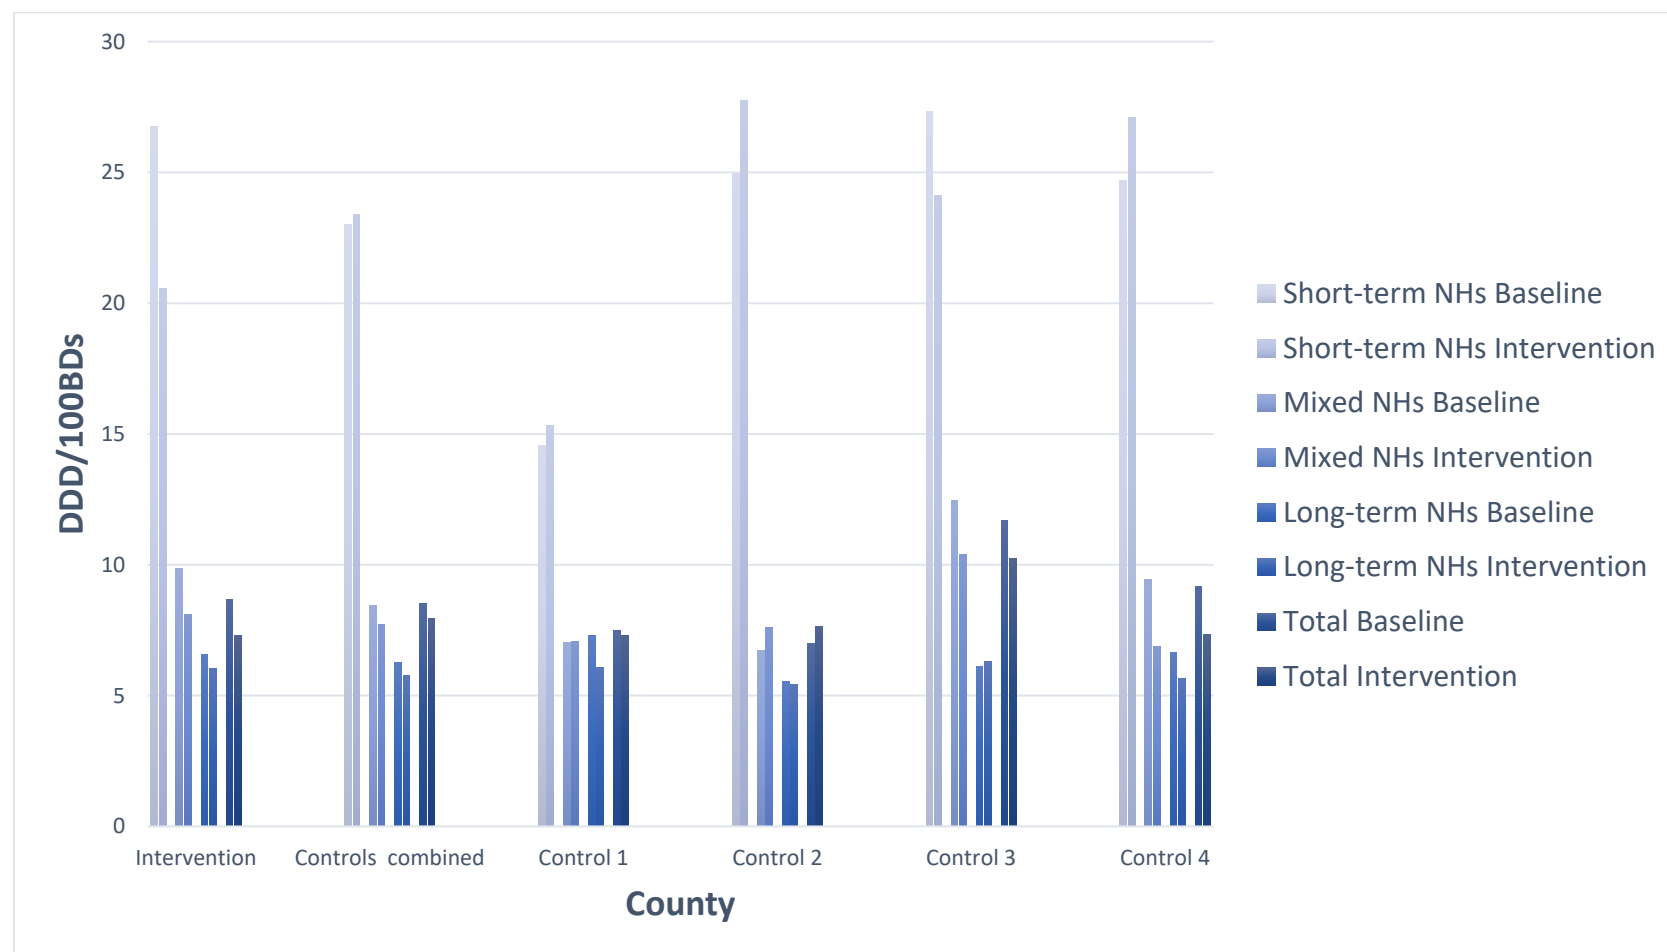

Table S2. Linear mixed model to identify the model-based comparison of changes in proportion of guideline-compliant antibiotics, pre- (Oct. 2015 – Oct. 2016) versus post-intervention (Oct. 2016 – Oct. 2017) between the intervention county and the control counties combined (number of observations: 336).

|                                                                                                       | Estimated Difference |                  |      |
|-------------------------------------------------------------------------------------------------------|----------------------|------------------|------|
|                                                                                                       | $\beta$              | 95% CI           | P    |
| Change in guideline-compliant antibiotic use in control counties combined                             | ref.                 |                  |      |
| Comparison of change in guideline-compliant antibiotic use between intervention and controls combined | -0.03                | -0.09 – 0.02     | 0.23 |
| Nursing home category:                                                                                |                      |                  |      |
| Mixed                                                                                                 | ref.                 |                  |      |
| Long-term                                                                                             | -0.01                | -0.06 – 0.04     | 0.71 |
| Short-term                                                                                            | -0.06                | -0.13 – 0.003    | 0.06 |
| Size of nursing home:                                                                                 |                      |                  |      |
| Small                                                                                                 | ref.                 |                  |      |
| Medium                                                                                                | -0.001               | -0.04 – 0.04     | 0.96 |
| Large                                                                                                 | -0.08                | -0.15 – 0.004    | 0.04 |
| Doctor hours/bed/week                                                                                 | < 0.001              | < -0.001 – 0.001 | 0.2  |

Table S3. Linear mixed model to evaluate the model-based estimated change in total methenamine use, pre- (Oct. 2015 – Oct. 2016) versus post-intervention (Oct. 2016 – Oct. 2017) in the intervention county (number of observations: 321).

|                                                            | Estimated Change |               |       |
|------------------------------------------------------------|------------------|---------------|-------|
|                                                            | $\beta$          | 95% CI        | P     |
| Change in total methenamine use in the intervention county | -1.34            | -2.24 – -0.44 | 0.003 |
| Nursing home category:                                     |                  |               |       |
| Mixed                                                      | ref.             |               |       |
| Long-term                                                  | 1.47             | -1.09 – 4.03  | 0.26  |
| Short-term                                                 | -2.9             | -6.09 – 0.3   | 0.08  |
| Size of nursing home:                                      |                  |               |       |
| Small                                                      | ref.             |               |       |
| Medium                                                     | -1.83            | -4.18 – 0.51  | 0.13  |
| Large                                                      | -0.83            | -4.32 – 2.67  | 0.64  |
| Doctor hours/bed/week                                      | -0.02            | -0.06 – 0.02  | 0.27  |

Table S4. Linear mixed model regression analysis to evaluate the model-based estimated comparison of change in methenamine use, pre- (Oct. 2015 – Oct. 2016) versus post-intervention (Oct. 2016 – Oct. 2017) between the intervention county and control counties (number of observations: 336).

|                                                                                          | Estimated Difference |               |       |
|------------------------------------------------------------------------------------------|----------------------|---------------|-------|
|                                                                                          | $\beta$              | 95% CI        | P     |
| Change in total methenamine use in control counties combined                             | ref.                 |               |       |
| Comparison of change in total methenamine use between intervention and combined controls | -1.34                | -2.55 – -0.14 | 0.029 |
| Nursing home category:                                                                   |                      |               |       |
| Mixed                                                                                    | ref.                 |               |       |
| Long-term                                                                                | 1.57                 | -1.08 – 4.21  | 0.245 |
| Short-term                                                                               | -2.01                | 4.71 – 0.69   | 0.145 |
| Size of nursing home:                                                                    |                      |               |       |
| Small                                                                                    | ref.                 |               |       |
| Medium                                                                                   | -1.33                | -3.81 – 1.14  | 0.292 |
| Large                                                                                    | -0.01                | -3.26 – 3.24  | 0.997 |
| Doctor hours/bed/week                                                                    | -0.03                | -0.07 – 0.01  | 0.106 |
